# Supplementary material for: Overexpression of theTectona grandis TgNAC01regulates growth, leaf senescence and confer salt stress tolerance in transgenic tobacco plants
Source: PeerJ journal article supplement (doi:10.7717/peerj.13039), 2022-03-03
Supplement: Figure_S3.pdf [file Figure_S3.pdf]

CLUSTAL format alignment by MAFFT (v7.452)

TgNAC01 MEKVSLLKNGVLRLLPPGFRFHPTDEELVVQYLKRKVLSCPLPASIPEVDVCKSDPWDLP  
Tg15g04300 MEKVSLLKNGVLRLLPPGFRFHPTDEELVVQYLKRKVLSCPLPASIPEVDVCKSDPWDLP  
\*\*\*\*\*

TgNAC01 GDSEQERYFFSTREIKYPNGNRSNRATVSGYWKATGLDKQIVSTRSHQIVGMKKTLVFYR  
Tg15g04300 GDSEQERYFFSTREIKYPNGNRSNRATVSGYWKATGLDKQIVSTRSHQIVGMKKTLVFYR  
\*\*\*\*\*

TgNAC01 GKPPKGCRTDWIMHEYRLITAQNSAITSPQAKNLAQVRFELVA-----  
Tg15g04300 GKPPKGCRTDWIMHEYRLITAQNSAITSPQAKNLAQENWVLCRIFLKRNRSKTDDEAAAM  
\*\*\*\*\*

TgNAC01 -----  
Tg15g04300 QNSGRATGAVPVFYDFMAKERADLNLLPANSSSGSSGITQISSRNESDDHEESSCNSFP

TgNAC01 -----  
Tg15g04300 TSFRRNLCS
