# Supplementary material for: Overexpression of theTectona grandis TgNAC01regulates growth, leaf senescence and confer salt stress tolerance in transgenic tobacco plants
Source: PeerJ journal article supplement (doi:10.7717/peerj.13039), 2022-03-03

**a****35S:TgNAC01**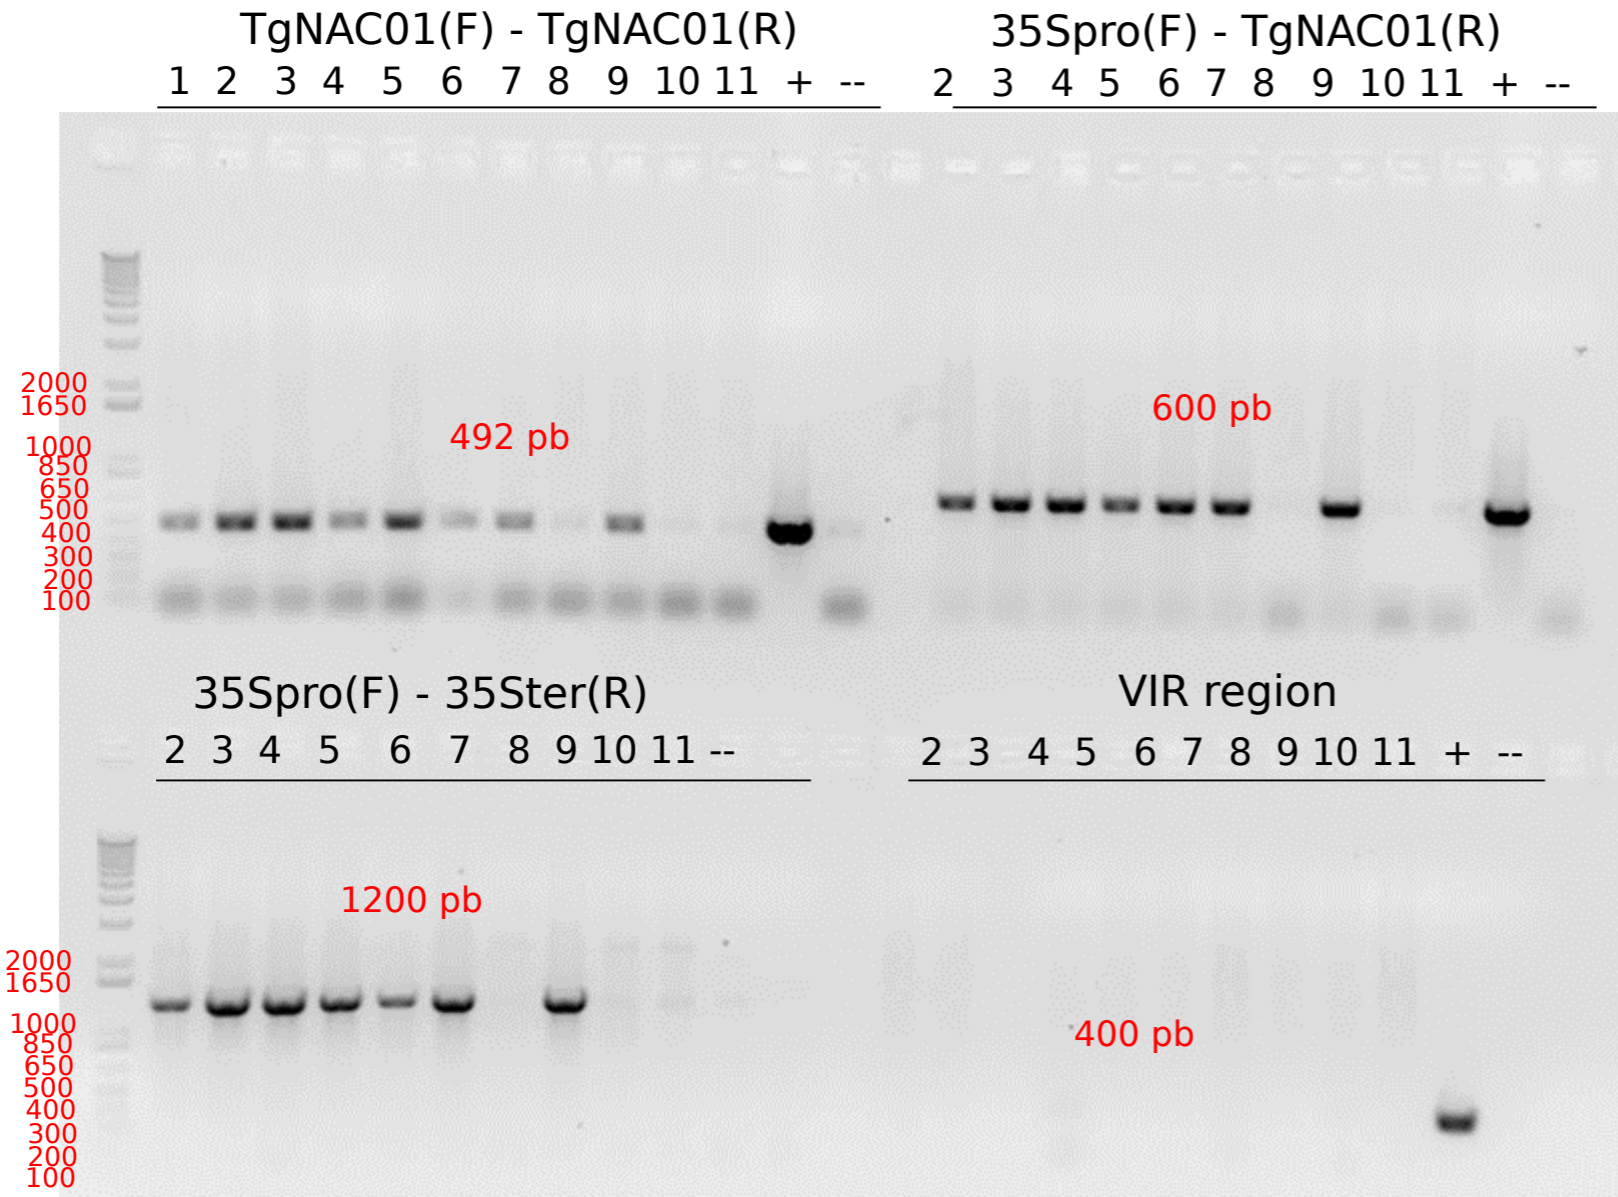**b**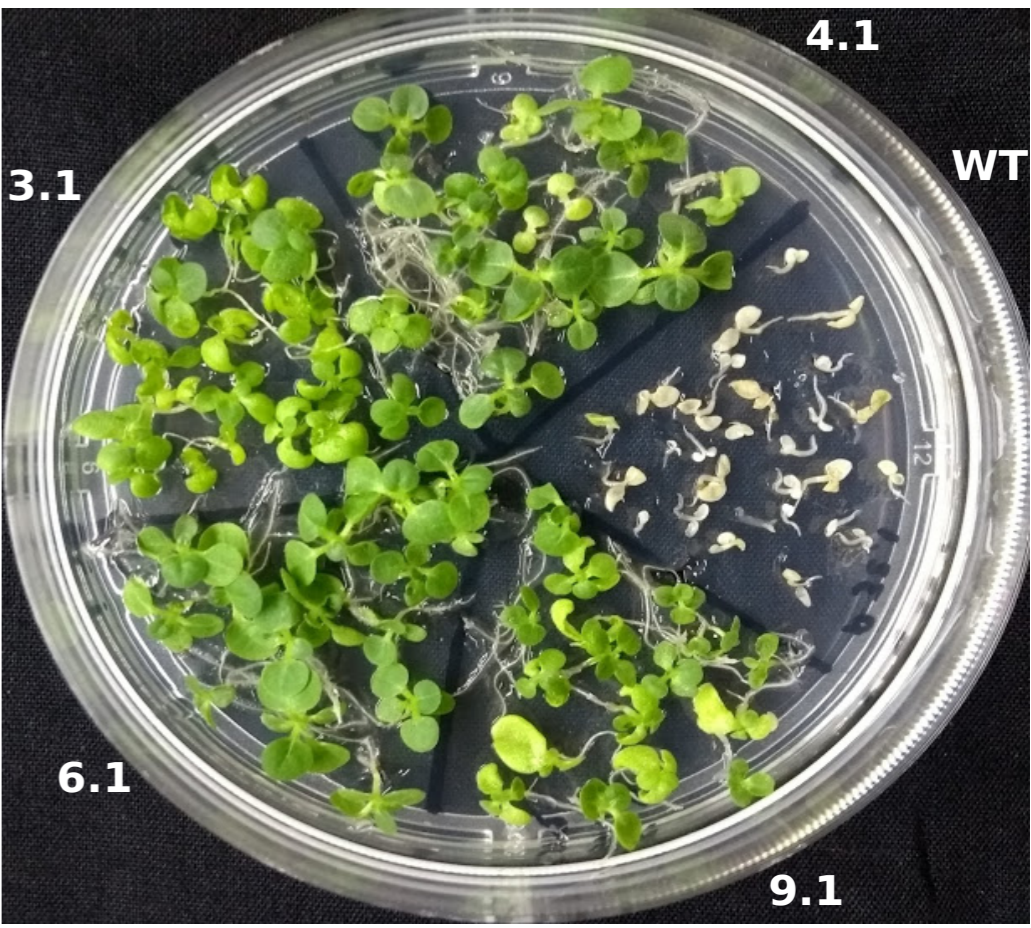

Supplement: Figure_S4.pdf [file Figure_S4.pdf]
