# Supplementary material for: Overexpression of theTectona grandis TgNAC01regulates growth, leaf senescence and confer salt stress tolerance in transgenic tobacco plants
Source: PeerJ journal article supplement (doi:10.7717/peerj.13039), 2022-03-03
Supplement: Figure_S6.pdf [file Figure_S6.pdf]

# LOCTREE 3

Protein Subcellular Localization Prediction System

| Protein ID | Score | Expected Accuracy | Localization Class | Gene Ontology Terms      | Annotation Type |
|------------|-------|-------------------|--------------------|--------------------------|-----------------|
| TgNAC01    | 56    | 92%               | nucleus            | nucleus GO:0005634(IDA); | PSI-BLAST       |

Predicted Localization: nucleus

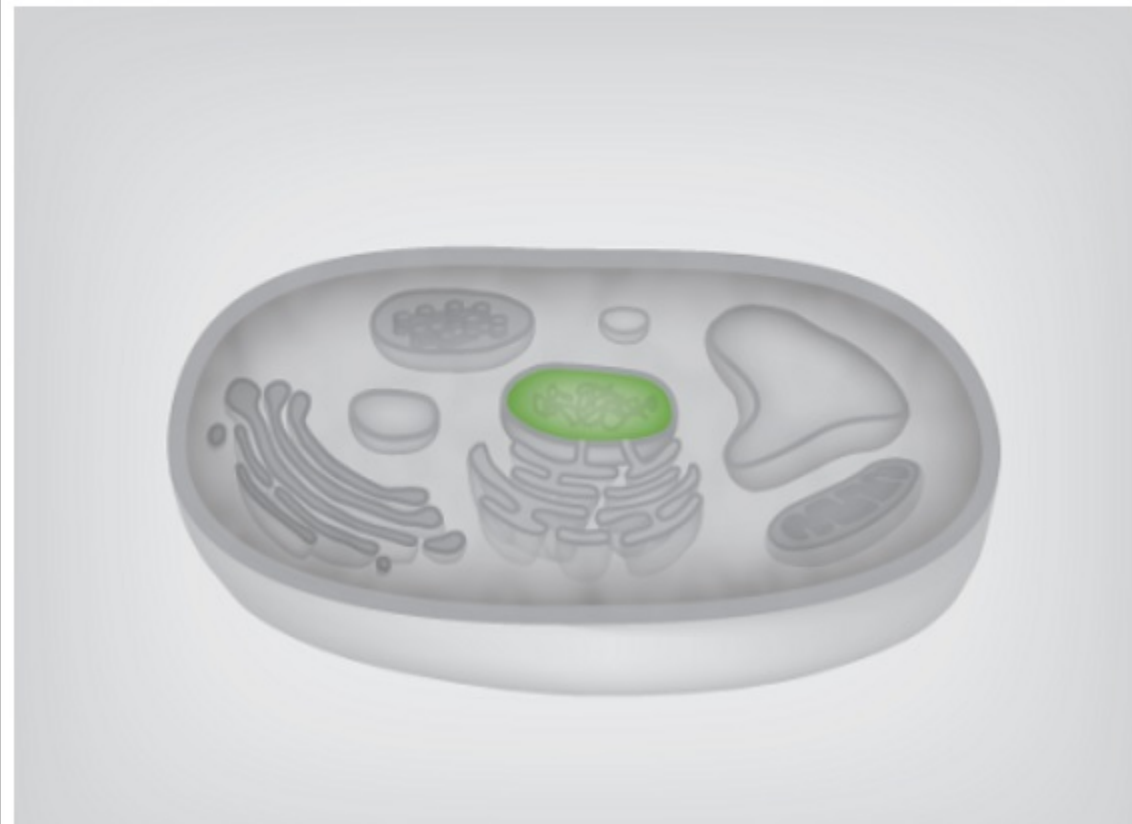

>NAC29\_ARATH

Identities = 86/138 (62%), Positives = 101/138 (73%), Gaps = 6/138 (4%)

Query: 11 VLRLPPGFRFHPTDEELVQYLKRVLSCLPASIIPEVDVCKSDPWLGD----SEQR 66  
LPPGFRFHPTDEEL+V YL+ + +S P P SIIPEVD+ K DPW L + E E

Sbjct: 6 QSTLPPGFRFHPTDEELIVYYLRNQTMSKPCPVSIPEVDIYKFDPWQLPEKTEFGENEW 65

Query: 67 YFFSTREIKYPNGNRSNRATVSGYWKATGLDKQIVSTRSHQIVGMKKTTLVFYRGKPPKGC 126  
YFFS RE KYPNG R NRA VSGYWKATG DK I S S+ VG+KK LVFY+G+PPKG

Sbjct: 66 YFFSPRERKYPNGVRPNRAAVSGYWKATGTDKAIHSGSSN--VGKKALVFYKGRPPKGI 123

Query: 127 RTDWIMHEYRLITAQNSA 144  
+TDWIMHEYRL ++ ++

Sbjct: 124 KTDWIMHEYRLHDSRKAS 141
