# Supplementary material for: Overexpression of theTectona grandis TgNAC01regulates growth, leaf senescence and confer salt stress tolerance in transgenic tobacco plants
Source: PeerJ journal article supplement (doi:10.7717/peerj.13039), 2022-03-03
Supplement: Figure_S7.pdf [file Figure_S7.pdf]

Protein: TgNAC01

Length: 163

N-terminus: OUT

Number of transmembrane helices: 0

Transmembrane helices: 0

Total entropy of the model: 17.0131

Entropy of the best path: 17.0131

The best path:

|      |            |            |            |            |            |    |
|------|------------|------------|------------|------------|------------|----|
| seq  | MEKVSLLKNG | VLRLPPGFRF | HPTDEELVVQ | YLKRKVLSCP | LPASIIPEVD | 50 |
| pred | 000000000  | 000000000  | 000000000  | 000000000  | 000000000  |    |

|      |            |            |            |            |            |     |
|------|------------|------------|------------|------------|------------|-----|
| seq  | VCKSDPWDLP | GDSEQERYFF | STREIKYPNG | NRSNRATVSG | YWKATGLDKQ | 100 |
| pred | 000000000  | 000000000  | 000000000  | 000000000  | 000000000  |     |

|      |            |             |            |            |            |     |
|------|------------|-------------|------------|------------|------------|-----|
| seq  | IVSTRSHQIV | GMKKTLLVFYR | GKPPKGCRTD | WIMHEYRLIT | AQNSAITSPQ | 150 |
| pred | 000000000  | 000000000   | 000000000  | 000000000  | 000000000  |     |

|      |            |     |     |
|------|------------|-----|-----|
| seq  | AKNLAQVRFE | LVA | 163 |
| pred | 000000000  | 000 |     |
