# Supplementary material for: Overexpression of theTectona grandis TgNAC01regulates growth, leaf senescence and confer salt stress tolerance in transgenic tobacco plants
Source: PeerJ journal article supplement (doi:10.7717/peerj.13039), 2022-03-03

# 35S:TgNAC01- EGFP

TgNAC01(F) - TgNAC01(R)

1 2 3 4 5 6 7 8 + -

35Spro(F) - 35Ster(R)

1 2 3 4 5 6 7 8 + -

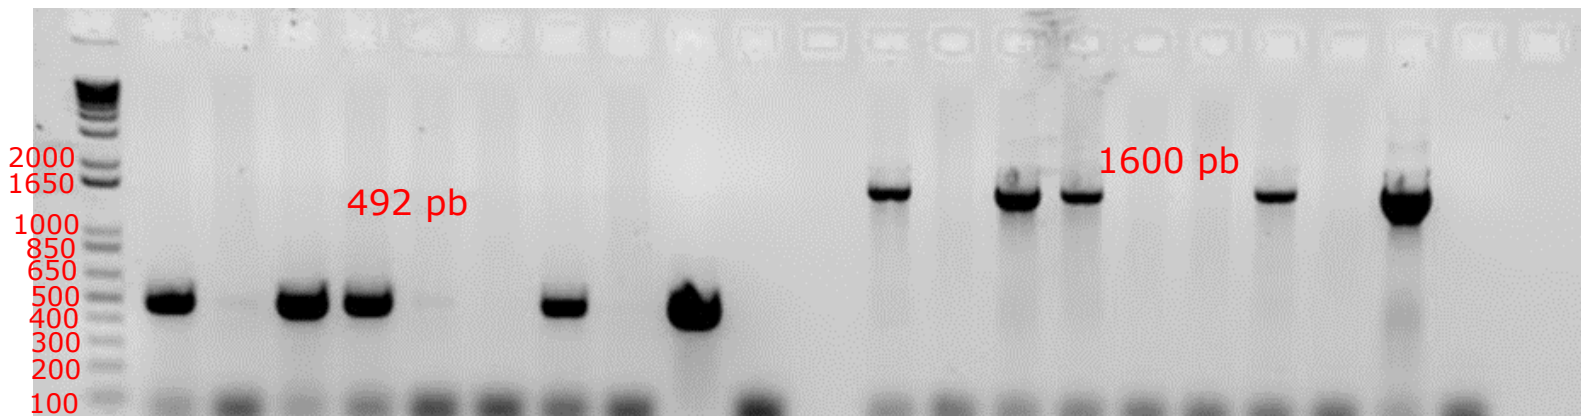

35Spro(F) - EGFP(R)

1 2 3 4 5 6 7 8 + -

VIR region

1 2 3 4 5 6 7 8 + -

2000  
1650  
1000  
850  
650  
500  
400  
300  
200  
100

1200 pb

400 pb

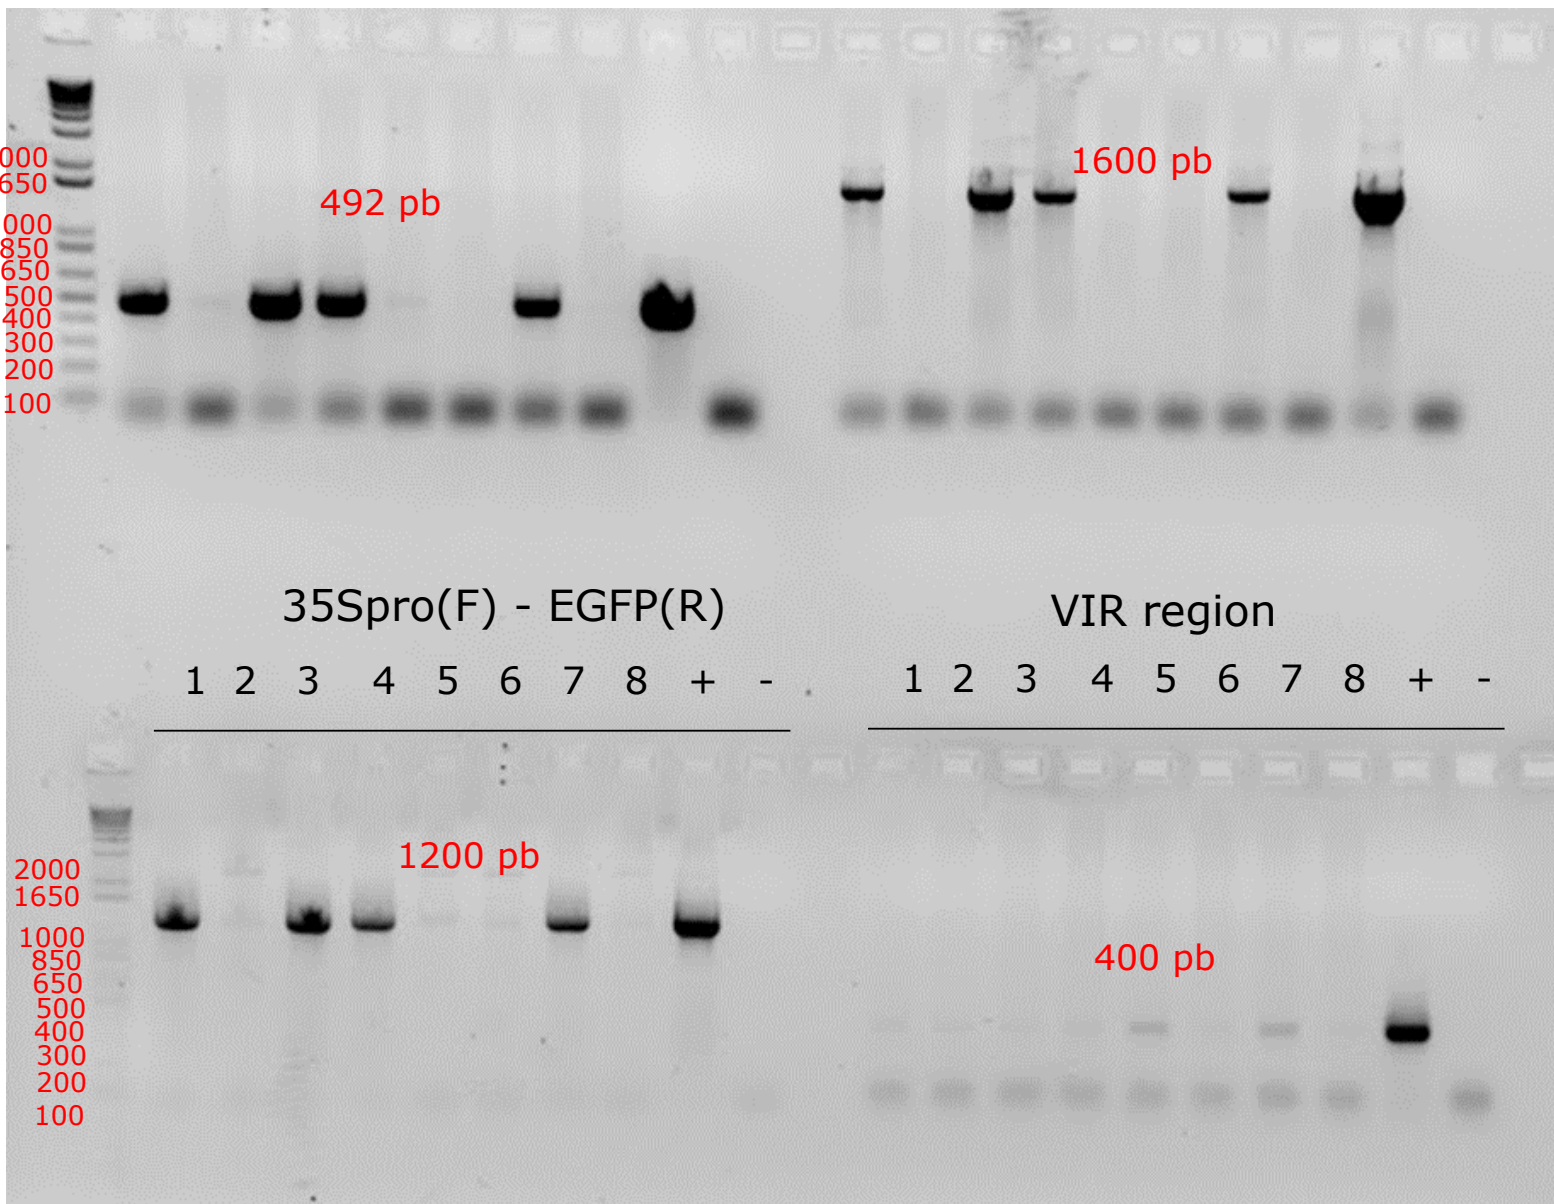

Supplement: Figure_S8.pdf [file Figure_S8.pdf]
