# Supplementary material for: Overexpression of theTectona grandis TgNAC01regulates growth, leaf senescence and confer salt stress tolerance in transgenic tobacco plants
Source: PeerJ journal article supplement (doi:10.7717/peerj.13039), 2022-03-03
Supplement: Figure_S9.pdf [file Figure_S9.pdf]

0 mM

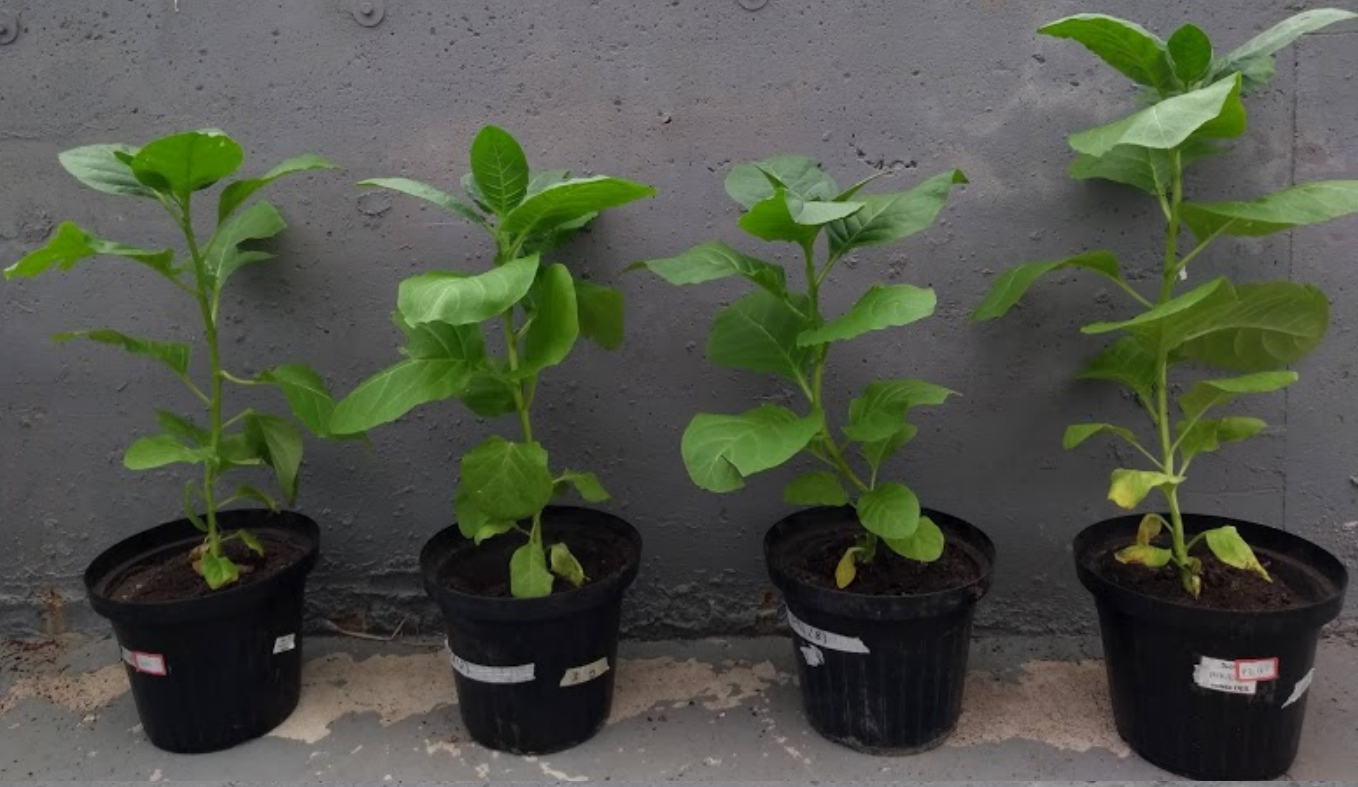

300 mM

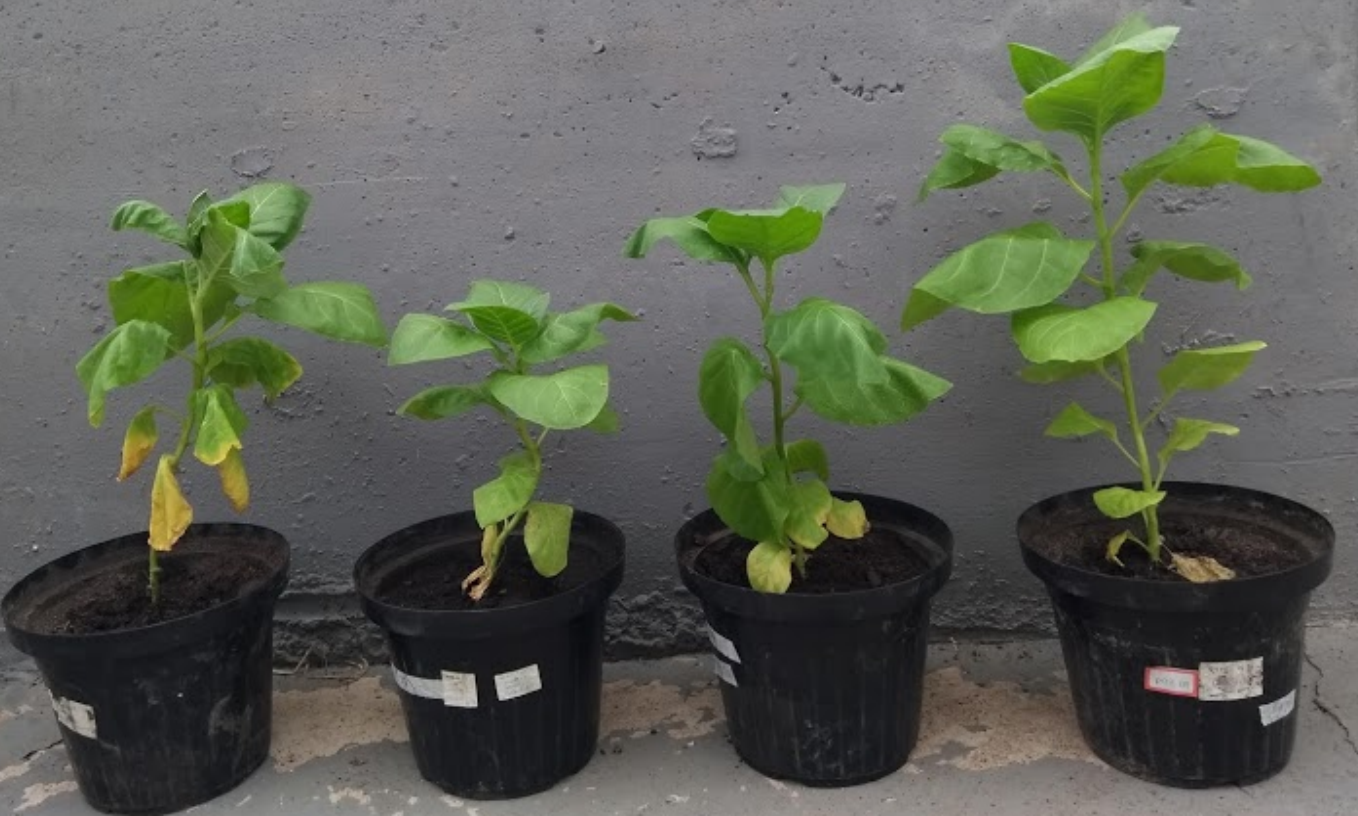

WT

35S:TgNAC1-6

35S:TgNAC1-4

35S:TgNAC1-3
